# Supplementary material for: Effect of platelet concentrates for pain and symptom management in oral lichen planus: an evidence-based systematic review
Source: Springer Nature journal article supplement (doi:10.1186/s12903-023-03296-1), 2023-08-25
Supplement: MOESM1 [file 25964372]

# SUPPLEMENTARY MATERIALS

**sTable 1.**The search strategies for Pubmed, OVID Medline, Embase, Cochrane central register of controlled trials and WanFang

|    |                                                                                                                    |
|----|--------------------------------------------------------------------------------------------------------------------|
| #1 | Steroids [Mesh] OR topical steroids OR corticosteroids OR corticosteroids therapy                                  |
| #2 | Oral Lichen Planus[MeSH ) OR Lichen Planus, Oral OR lichen planus OR OLP OR Oral Lichen Planus                     |
| #3 | Platelet-rich plasma [Mesh] OR PRP OR Platelet OR Platelet gel                                                     |
| #4 | Injectable platelet-rich fibrin [Mesh] OR i-PRF OR Growth factor concentrate OR PRF OR Liquid platelet-rich fibrin |
| #5 | plasma rich in growth factors [Mesh] OR PRGF                                                                       |
| #6 | #3 OR #4 OR #5                                                                                                     |
| #7 | #6 AND #1 AND #2                                                                                                   |

WanFang: [All Fields] "Oral Lichen Planus" AND [All Fields]"Platelet-rich plasma"

sTable 2. The Rob results

| Unique ID                                                 | 1                                                                                                                                                                                   | Study ID    | EIGhareeb, 2023                                             | Assessor                                                                                                                     | YM Zhang                                     |
|-----------------------------------------------------------|-------------------------------------------------------------------------------------------------------------------------------------------------------------------------------------|-------------|-------------------------------------------------------------|------------------------------------------------------------------------------------------------------------------------------|----------------------------------------------|
| Ref or Label                                              | 10.1111/jocd.15622                                                                                                                                                                  | Aim         | assignment to intervention (the 'intention-totreat' effect) |                                                                                                                              |                                              |
| Experimental                                              | PRP                                                                                                                                                                                 | Comparator  | TA                                                          | Source                                                                                                                       | Journal article(s) with results of the trial |
| Outcome                                                   | VAS, REU                                                                                                                                                                            | Results     | 0-10                                                        | Weight                                                                                                                       | 1                                            |
| Domain                                                    | Signalling question                                                                                                                                                                 | Response    |                                                             | Comments                                                                                                                     |                                              |
| <b>Bias arising from the randomization process</b>        | 1.1 Was the allocation sequence random?                                                                                                                                             | N           |                                                             | Not mention                                                                                                                  |                                              |
|                                                           | 1.2 Was the allocation sequence concealed until participants were enrolled and assigned to interventions?                                                                           | N           |                                                             |                                                                                                                              |                                              |
|                                                           | 1.3 Did baseline differences between intervention groups suggest a problem with the randomization process?                                                                          | N           |                                                             | There were no statistically significant differences between the studied groups in REU and pain score (NRS) before treatment. |                                              |
|                                                           | <b>Risk of bias judgement</b>                                                                                                                                                       | <b>High</b> |                                                             |                                                                                                                              |                                              |
| <b>Bias due to deviations from intended interventions</b> | 2.1. Were participants aware of their assigned intervention during the trial?                                                                                                       | Y           |                                                             |                                                                                                                              |                                              |
|                                                           | 2.2. Were carers and people delivering the interventions aware of participants' assigned intervention during the trial?                                                             | Y           |                                                             |                                                                                                                              |                                              |
|                                                           | 2.3. If Y/PY/NI to 2.1 or 2.2: Were there deviations from the intended intervention that arose because of the experimental context?                                                 | NI          |                                                             |                                                                                                                              |                                              |
|                                                           | 2.4 If Y/PY to 2.3: Were these deviations likely to have affected the outcome?                                                                                                      | NA          |                                                             |                                                                                                                              |                                              |
|                                                           | 2.5. If Y/PY/NI to 2.4: Were these deviations from intended intervention balanced between groups?                                                                                   | NA          |                                                             |                                                                                                                              |                                              |
|                                                           | 2.6 Was an appropriate analysis used to estimate the effect of assignment to intervention?                                                                                          | N           |                                                             |                                                                                                                              |                                              |
|                                                           | 2.7 If N/PN/NI to 2.6: Was there potential for a substantial impact (on the result) of the failure to analyse participants in the group to which they were randomized?              | NI          |                                                             |                                                                                                                              |                                              |
| <b>Risk of bias judgement</b>                             | <b>Some concerns</b>                                                                                                                                                                |             | Because of the specific nature of the treatment             |                                                                                                                              |                                              |
| <b>Bias due to missing outcome data</b>                   | 3.1 Were data for this outcome available for all, or nearly all, participants randomized?                                                                                           | Y           |                                                             |                                                                                                                              |                                              |
|                                                           | 3.2 If N/PN/NI to 3.1: Is there evidence that result was not biased by missing outcome data?                                                                                        | NA          |                                                             |                                                                                                                              |                                              |
|                                                           | 3.3 If N/PN to 3.2: Could missingness in the outcome depend on its true value?                                                                                                      | NA          |                                                             |                                                                                                                              |                                              |
|                                                           | 3.4 If Y/PY/NI to 3.3: Is it likely that missingness in the outcome depended on its true value?                                                                                     | NA          |                                                             |                                                                                                                              |                                              |
|                                                           | <b>Risk of bias judgement</b>                                                                                                                                                       | <b>Low</b>  |                                                             |                                                                                                                              |                                              |
| <b>Bias in measurement of the outcome</b>                 | 4.1 Was the method of measuring the outcome inappropriate?                                                                                                                          | N           |                                                             |                                                                                                                              |                                              |
|                                                           | 4.2 Could measurement or ascertainment of the outcome have differed between intervention groups?                                                                                    | N           |                                                             |                                                                                                                              |                                              |
|                                                           | 4.3 Were outcome assessors aware of the intervention received by study participants?                                                                                                | NI          |                                                             |                                                                                                                              |                                              |
|                                                           | 4.4 If Y/PY/NI to 4.3: Could assessment of the outcome have been influenced by knowledge of intervention received?                                                                  | PN          |                                                             |                                                                                                                              |                                              |
|                                                           | 4.5 If Y/PY/NI to 4.4: Is it likely that assessment of the outcome was influenced by knowledge of intervention received?                                                            | NA          |                                                             |                                                                                                                              |                                              |
|                                                           | <b>Risk of bias judgement</b>                                                                                                                                                       | <b>Low</b>  |                                                             |                                                                                                                              |                                              |
| <b>Bias in selection of the reported result</b>           | 5.1 Were the data that produced this result analysed in accordance with a pre-specified analysis plan that was finalized before unblinded outcome data were available for analysis? | Y           |                                                             |                                                                                                                              |                                              |
|                                                           | 5.2 ... multiple eligible outcome measurements (e.g. scales, definitions, time points) within the outcome domain?                                                                   | PN          |                                                             |                                                                                                                              |                                              |
|                                                           | 5.3 ... multiple eligible analyses of the data?                                                                                                                                     | N           |                                                             |                                                                                                                              |                                              |
|                                                           | <b>Risk of bias judgement</b>                                                                                                                                                       | <b>Low</b>  |                                                             |                                                                                                                              |                                              |
| <b>Overall bias</b>                                       | <b>Risk of bias judgement</b>                                                                                                                                                       |             | <b>High</b>                                                 |                                                                                                                              |                                              |
| Unique ID                                                 | 2                                                                                                                                                                                   | Study ID    | Hijazi, 2022                                                | Assessor                                                                                                                     | YM Zhang                                     |
| Ref or Label                                              | 10.1002/cre2.550                                                                                                                                                                    | Aim         | assignment to intervention (the 'intention-totreat' effect) |                                                                                                                              |                                              |

|                                                           |                                                                                                                                                                                     |                 |                                                             |                 |                                                                                                                        |
|-----------------------------------------------------------|-------------------------------------------------------------------------------------------------------------------------------------------------------------------------------------|-----------------|-------------------------------------------------------------|-----------------|------------------------------------------------------------------------------------------------------------------------|
| Experimental                                              | PRP                                                                                                                                                                                 | Comparator      | TA                                                          | Source          | Journal article(s) with results of the trial                                                                           |
| Outcome                                                   | VAS, Sign score                                                                                                                                                                     | Results         | 2023/1/10                                                   | Weight          | 1                                                                                                                      |
| <b>Domain</b>                                             | <b>Signalling question</b>                                                                                                                                                          |                 |                                                             | <b>Response</b> | <b>Comments</b>                                                                                                        |
| <b>Bias arising from the randomization process</b>        | 1.1 Was the allocation sequence random?                                                                                                                                             |                 |                                                             | Y               | Simple randomization using computer-based sequence generation software was used after patients' consent of enrollment. |
|                                                           | 1.2 Was the allocation sequence concealed until participants were enrolled and assigned to interventions?                                                                           |                 |                                                             | Y               |                                                                                                                        |
|                                                           | 1.3 Did baseline differences between intervention groups suggest a problem with the randomization process?                                                                          |                 |                                                             | N               |                                                                                                                        |
|                                                           | <b>Risk of bias judgement</b>                                                                                                                                                       |                 |                                                             | <b>Low</b>      |                                                                                                                        |
| <b>Bias due to deviations from intended interventions</b> | 2.1. Were participants aware of their assigned intervention during the trial?                                                                                                       |                 |                                                             | Y               | PRP was prepared in the same visit                                                                                     |
|                                                           | 2.2. Were carers and people delivering the interventions aware of participants' assigned intervention during the trial?                                                             |                 |                                                             | Y               |                                                                                                                        |
|                                                           | 2.3. If Y/PY/NI to 2.1 or 2.2: Were there deviations from the intended intervention that arose because of the experimental context?                                                 |                 |                                                             | N               |                                                                                                                        |
|                                                           | 2.4 If Y/PY to 2.3: Were these deviations likely to have affected the outcome?                                                                                                      |                 |                                                             | NA              |                                                                                                                        |
|                                                           | 2.5. If Y/PY/NI to 2.4: Were these deviations from intended intervention balanced between groups?                                                                                   |                 |                                                             | NA              |                                                                                                                        |
|                                                           | 2.6 Was an appropriate analysis used to estimate the effect of assignment to intervention?                                                                                          |                 |                                                             | Y               |                                                                                                                        |
|                                                           | 2.7 If N/PN/NI to 2.6: Was there potential for a substantial impact (on the result) of the failure to analyse participants in the group to which they were randomized?              |                 |                                                             | NA              |                                                                                                                        |
|                                                           | <b>Risk of bias judgement</b>                                                                                                                                                       |                 |                                                             | <b>Low</b>      |                                                                                                                        |
| <b>Bias due to missing outcome data</b>                   | 3.1 Were data for this outcome available for all, or nearly all, participants randomized?                                                                                           |                 |                                                             | Y               |                                                                                                                        |
|                                                           | 3.2 If N/PN/NI to 3.1: Is there evidence that result was not biased by missing outcome data?                                                                                        |                 |                                                             | NA              |                                                                                                                        |
|                                                           | 3.3 If N/PN to 3.2: Could missingness in the outcome depend on its true value?                                                                                                      |                 |                                                             | NA              |                                                                                                                        |
|                                                           | 3.4 If Y/PY/NI to 3.3: Is it likely that missingness in the outcome depended on its true value?                                                                                     |                 |                                                             | NA              |                                                                                                                        |
|                                                           | <b>Risk of bias judgement</b>                                                                                                                                                       |                 |                                                             | <b>Low</b>      |                                                                                                                        |
| <b>Bias in measurement of the outcome</b>                 | 4.1 Was the method of measuring the outcome inappropriate?                                                                                                                          |                 |                                                             | N               | The assessor of outcomes was blinded                                                                                   |
|                                                           | 4.2 Could measurement or ascertainment of the outcome have differed between intervention groups?                                                                                    |                 |                                                             | N               |                                                                                                                        |
|                                                           | 4.3 Were outcome assessors aware of the intervention received by study participants?                                                                                                |                 |                                                             | Y               |                                                                                                                        |
|                                                           | 4.4 If Y/PY/NI to 4.3: Could assessment of the outcome have been influenced by knowledge of intervention received?                                                                  |                 |                                                             | N               |                                                                                                                        |
|                                                           | 4.5 If Y/PY/NI to 4.4: Is it likely that assessment of the outcome was influenced by knowledge of intervention received?                                                            |                 |                                                             | NA              |                                                                                                                        |
|                                                           | <b>Risk of bias judgement</b>                                                                                                                                                       |                 |                                                             | <b>Low</b>      |                                                                                                                        |
| <b>Bias in selection of the reported result</b>           | 5.1 Were the data that produced this result analysed in accordance with a pre-specified analysis plan that was finalized before unblinded outcome data were available for analysis? |                 |                                                             | Y               |                                                                                                                        |
|                                                           | 5.2 ... multiple eligible outcome measurements (e.g. scales, definitions, time points) within the outcome domain?                                                                   |                 |                                                             | N               |                                                                                                                        |
|                                                           | 5.3 ... multiple eligible analyses of the data?                                                                                                                                     |                 |                                                             | N               |                                                                                                                        |
|                                                           | <b>Risk of bias judgement</b>                                                                                                                                                       |                 |                                                             | <b>Low</b>      |                                                                                                                        |
| <b>Overall bias</b>                                       | <b>Risk of bias judgement</b>                                                                                                                                                       |                 |                                                             | <b>Low</b>      |                                                                                                                        |
| <b>Unique ID</b>                                          | 3                                                                                                                                                                                   | <b>Study ID</b> | Al-Hallak N, 2022                                           | <b>Assessor</b> | YM Zhang                                                                                                               |
| <b>Ref or Label</b>                                       | Efficacy of injectable platelet-rich fibrin in the treatment of symptomatic oral lichen planus                                                                                      | <b>Aim</b>      | assignment to intervention (the 'intention-totreat' effect) |                 |                                                                                                                        |
| Experimental                                              | I-PRF                                                                                                                                                                               | Comparator      | TA                                                          | Source          | Journal article(s) with results of the trial                                                                           |

| Outcome                                                   | VASREUPercentage of OLP recurrence                                                                                                                                                  | Results           | 2023/1/10                                                   | Weight          | 1                                                                                                                                              |
|-----------------------------------------------------------|-------------------------------------------------------------------------------------------------------------------------------------------------------------------------------------|-------------------|-------------------------------------------------------------|-----------------|------------------------------------------------------------------------------------------------------------------------------------------------|
| Domain                                                    | Signalling question                                                                                                                                                                 |                   | Response                                                    |                 | Comments                                                                                                                                       |
| <b>Bias arising from the randomization process</b>        | 1.1 Was the allocation sequence random?                                                                                                                                             |                   | Y                                                           |                 | For randomization, every participant was asked to choose a card from opaque box which included 12 cards with consecutive numbers from 1 to 12. |
|                                                           | 1.2 Was the allocation sequence concealed until participants were enrolled and assigned to interventions?                                                                           |                   | Y                                                           |                 |                                                                                                                                                |
|                                                           | 1.3 Did baseline differences between intervention groups suggest a problem with the randomization process?                                                                          |                   | N                                                           |                 |                                                                                                                                                |
|                                                           | <b>Risk of bias judgement</b>                                                                                                                                                       |                   | <b>Low</b>                                                  |                 |                                                                                                                                                |
| <b>Bias due to deviations from intended interventions</b> | 2.1. Were participants aware of their assigned intervention during the trial?                                                                                                       |                   | N                                                           |                 |                                                                                                                                                |
|                                                           | 2.2. Were carers and people delivering the interventions aware of participants' assigned intervention during the trial?                                                             |                   | NI                                                          |                 |                                                                                                                                                |
|                                                           | 2.3. If Y/PY/NI to 2.1 or 2.2: Were there deviations from the intended intervention that arose because of the experimental context?                                                 |                   | N                                                           |                 |                                                                                                                                                |
|                                                           | 2.4 If Y/PY to 2.3: Were these deviations likely to have affected the outcome?                                                                                                      |                   | NA                                                          |                 |                                                                                                                                                |
|                                                           | 2.5. If Y/PY/NI to 2.4: Were these deviations from intended intervention balanced between groups?                                                                                   |                   | NA                                                          |                 |                                                                                                                                                |
|                                                           | 2.6 Was an appropriate analysis used to estimate the effect of assignment to intervention?                                                                                          |                   | Y                                                           |                 |                                                                                                                                                |
|                                                           | 2.7 If N/PN/NI to 2.6: Was there potential for a substantial impact (on the result) of the failure to analyse participants in the group to which they were randomized?              |                   | NA                                                          |                 |                                                                                                                                                |
|                                                           | <b>Risk of bias judgement</b>                                                                                                                                                       |                   | <b>Low</b>                                                  |                 |                                                                                                                                                |
| <b>Bias due to missing outcome data</b>                   | 3.1 Were data for this outcome available for all, or nearly all, participants randomized?                                                                                           |                   | Y                                                           |                 |                                                                                                                                                |
|                                                           | 3.2 If N/PN/NI to 3.1: Is there evidence that result was not biased by missing outcome data?                                                                                        |                   | NA                                                          |                 |                                                                                                                                                |
|                                                           | 3.3 If N/PN to 3.2: Could missingness in the outcome depend on its true value?                                                                                                      |                   | NA                                                          |                 |                                                                                                                                                |
|                                                           | 3.4 If Y/PY/NI to 3.3: Is it likely that missingness in the outcome depended on its true value?                                                                                     |                   | NA                                                          |                 |                                                                                                                                                |
|                                                           | <b>Risk of bias judgement</b>                                                                                                                                                       |                   | <b>Low</b>                                                  |                 |                                                                                                                                                |
| <b>Bias in measurement of the outcome</b>                 | 4.1 Was the method of measuring the outcome inappropriate?                                                                                                                          |                   | N                                                           |                 |                                                                                                                                                |
|                                                           | 4.2 Could measurement or ascertainment of the outcome have differed between intervention groups?                                                                                    |                   | N                                                           |                 |                                                                                                                                                |
|                                                           | 4.3 Were outcome assessors aware of the intervention received by study participants?                                                                                                |                   | Y                                                           |                 |                                                                                                                                                |
|                                                           | 4.4 If Y/PY/NI to 4.3: Could assessment of the outcome have been influenced by knowledge of intervention received?                                                                  |                   | N                                                           |                 |                                                                                                                                                |
|                                                           | 4.5 If Y/PY/NI to 4.4: Is it likely that assessment of the outcome was influenced by knowledge of intervention received?                                                            |                   | NA                                                          |                 |                                                                                                                                                |
|                                                           | <b>Risk of bias judgement</b>                                                                                                                                                       |                   | <b>Low</b>                                                  |                 |                                                                                                                                                |
| <b>Bias in selection of the reported result</b>           | 5.1 Were the data that produced this result analysed in accordance with a pre-specified analysis plan that was finalized before unblinded outcome data were available for analysis? |                   | Y                                                           |                 |                                                                                                                                                |
|                                                           | 5.2 ... multiple eligible outcome measurements (e.g. scales, definitions, time points) within the outcome domain?                                                                   |                   | N                                                           |                 |                                                                                                                                                |
|                                                           | 5.3 ... multiple eligible analyses of the data?                                                                                                                                     |                   | N                                                           |                 |                                                                                                                                                |
|                                                           | <b>Risk of bias judgement</b>                                                                                                                                                       |                   | <b>Low</b>                                                  |                 |                                                                                                                                                |
| <b>Overall bias</b>                                       | <b>Risk of bias judgement</b>                                                                                                                                                       |                   | <b>Low</b>                                                  |                 |                                                                                                                                                |
| <b>Unique ID</b>                                          | 4                                                                                                                                                                                   | <b>Study ID</b>   | LH Zheng 2021                                               | <b>Assessor</b> | YM Zhang                                                                                                                                       |
| <b>Ref or Label</b>                                       | Therapeutic effect of injection of platelet-rich fibrin on erosive oral lichen planus                                                                                               | <b>Aim</b>        | assignment to intervention (the 'intention-totreat' effect) |                 |                                                                                                                                                |
| <b>Experimental</b>                                       | i-PRF                                                                                                                                                                               | <b>Comparator</b> | TA                                                          | <b>Source</b>   | Journal article(s) with results of the trial                                                                                                   |

| Outcome                                                   | VASSign score, lesion sizeeffective rate, recurrence rate                                                                                                                           | Results           | 2023/1/10                                                   | Weight          | 1                                            |
|-----------------------------------------------------------|-------------------------------------------------------------------------------------------------------------------------------------------------------------------------------------|-------------------|-------------------------------------------------------------|-----------------|----------------------------------------------|
| Domain                                                    | Signalling question                                                                                                                                                                 |                   | Response                                                    |                 | Comments                                     |
| <b>Bias arising from the randomization process</b>        | 1.1 Was the allocation sequence random?                                                                                                                                             |                   | Y                                                           |                 | Using STATA generates a randomized number    |
|                                                           | 1.2 Was the allocation sequence concealed until participants were enrolled and assigned to interventions?                                                                           |                   | Y                                                           |                 |                                              |
|                                                           | 1.3 Did baseline differences between intervention groups suggest a problem with the randomization process?                                                                          |                   | N                                                           |                 |                                              |
|                                                           | <b>Risk of bias judgement</b>                                                                                                                                                       |                   | <b>Low</b>                                                  |                 |                                              |
| <b>Bias due to deviations from intended interventions</b> | 2.1.Were participants aware of their assigned intervention during the trial?                                                                                                        |                   | Y                                                           |                 |                                              |
|                                                           | 2.2.Were carers and people delivering the interventions aware of participants' assigned intervention during the trial?                                                              |                   | Y                                                           |                 |                                              |
|                                                           | 2.3. If Y/PY/NI to 2.1 or 2.2: Were there deviations from the intended intervention that arose because of the experimental context?                                                 |                   | N                                                           |                 |                                              |
|                                                           | 2.4 If Y/PY to 2.3: Were these deviations likely to have affected the outcome?                                                                                                      |                   | NA                                                          |                 |                                              |
|                                                           | 2.5. If Y/PY/NI to 2.4: Were these deviations from intended intervention balanced between groups?                                                                                   |                   | NA                                                          |                 |                                              |
|                                                           | 2.6 Was an appropriate analysis used to estimate the effect of assignment to intervention?                                                                                          |                   | Y                                                           |                 |                                              |
|                                                           | 2.7 If N/PN/NI to 2.6: Was there potential for a substantial impact (on the result) of the failure to analyse participants in the group to which they were randomized?              |                   | NA                                                          |                 |                                              |
| <b>Risk of bias judgement</b>                             |                                                                                                                                                                                     | <b>Low</b>        |                                                             |                 |                                              |
| <b>Bias due to missing outcome data</b>                   | 3.1 Were data for this outcome available for all, or nearly all, participants randomized?                                                                                           |                   | Y                                                           |                 |                                              |
|                                                           | 3.2 If N/PN/NI to 3.1: Is there evidence that result was not biased by missing outcome data?                                                                                        |                   | NA                                                          |                 |                                              |
|                                                           | 3.3 If N/PN to 3.2: Could missingness in the outcome depend on its true value?                                                                                                      |                   | NA                                                          |                 |                                              |
|                                                           | 3.4 If Y/PY/NI to 3.3: Is it likely that missingness in the outcome depended on its true value?                                                                                     |                   | NA                                                          |                 |                                              |
|                                                           | <b>Risk of bias judgement</b>                                                                                                                                                       |                   | <b>Low</b>                                                  |                 |                                              |
| <b>Bias in measurement of the outcome</b>                 | 4.1 Was the method of measuring the outcome inappropriate?                                                                                                                          |                   | N                                                           |                 |                                              |
|                                                           | 4.2 Could measurement or ascertainment of the outcome have differed between intervention groups?                                                                                    |                   | N                                                           |                 |                                              |
|                                                           | 4.3 Were outcome assessors aware of the intervention received by study participants?                                                                                                |                   | Y                                                           |                 |                                              |
|                                                           | 4.4 If Y/PY/NI to 4.3: Could assessment of the outcome have been influenced by knowledge of intervention received?                                                                  |                   | N                                                           |                 |                                              |
|                                                           | 4.5 If Y/PY/NI to 4.4: Is it likely that assessment of the outcome was influenced by knowledge of intervention received?                                                            |                   | NA                                                          |                 |                                              |
|                                                           | <b>Risk of bias judgement</b>                                                                                                                                                       |                   | <b>Low</b>                                                  |                 |                                              |
| <b>Bias in selection of the reported result</b>           | 5.1 Were the data that produced this result analysed in accordance with a pre-specified analysis plan that was finalized before unblinded outcome data were available for analysis? |                   | Y                                                           |                 |                                              |
|                                                           | 5.2 ... multiple eligible outcome measurements (e.g. scales, definitions, time points) within the outcome domain?                                                                   |                   | N                                                           |                 |                                              |
|                                                           | 5.3 ... multiple eligible analyses of the data?                                                                                                                                     |                   | N                                                           |                 |                                              |
|                                                           | <b>Risk of bias judgement</b>                                                                                                                                                       |                   | <b>Low</b>                                                  |                 |                                              |
| <b>Overall bias</b>                                       | <b>Risk of bias judgement</b>                                                                                                                                                       |                   | <b>Low</b>                                                  |                 |                                              |
| <b>Unique ID</b>                                          | 5                                                                                                                                                                                   | <b>Study ID</b>   | Saglam, 2021                                                | <b>Assessor</b> | YM Zhang                                     |
| <b>Ref or Label</b>                                       | Efficacy of injectable platelet-rich fibrin in the erosive orallichen planus: a split-mouth, randomized, controlled clinicaltrial                                                   | <b>Aim</b>        | assignment to intervention (the 'intention-totreat' effect) |                 |                                              |
| <b>Experimental</b>                                       | i-PRF                                                                                                                                                                               | <b>Comparator</b> | methylprednisolone acetate                                  | <b>Source</b>   | Journal article(s) with results of the trial |

| Outcome                                                   | VAS, lesion size, OHIP-14                                                                                                                                                           | Results    | 2023/1/10  | Weight                                                                                                                                              | 1 |
|-----------------------------------------------------------|-------------------------------------------------------------------------------------------------------------------------------------------------------------------------------------|------------|------------|-----------------------------------------------------------------------------------------------------------------------------------------------------|---|
| Domain                                                    | Signalling question                                                                                                                                                                 |            | Response   | Comments                                                                                                                                            |   |
| <b>Bias arising from the randomization process</b>        | 1.1 Was the allocation sequence random?                                                                                                                                             |            | Y          | The lesions of the patients were randomly divided into two groups by an independent researcher (T.U.) using a computer-assisted randomization table |   |
|                                                           | 1.2 Was the allocation sequence concealed until participants were enrolled and assigned to interventions?                                                                           |            | Py         |                                                                                                                                                     |   |
|                                                           | 1.3 Did baseline differences between intervention groups suggest a problem with the randomization process?                                                                          |            | N          |                                                                                                                                                     |   |
|                                                           | <b>Risk of bias judgement</b>                                                                                                                                                       |            | <b>Low</b> |                                                                                                                                                     |   |
| <b>Bias due to deviations from intended interventions</b> | 2.1. Were participants aware of their assigned intervention during the trial?                                                                                                       |            | Y          | Assignments were hidden from the physician performing the treatment (Z.B.Ö.) until the first treatment session, from the physician                  |   |
|                                                           | 2.2. Were carers and people delivering the interventions aware of participants' assigned intervention during the trial?                                                             |            | N          |                                                                                                                                                     |   |
|                                                           | 2.3. If Y/PY/NI to 2.1 or 2.2: Were there deviations from the intended intervention that arose because of the experimental context?                                                 |            | N          |                                                                                                                                                     |   |
|                                                           | 2.4 If Y/PY to 2.3: Were these deviations likely to have affected the outcome?                                                                                                      |            | NA         |                                                                                                                                                     |   |
|                                                           | 2.5. If Y/PY/NI to 2.4: Were these deviations from intended intervention balanced between groups?                                                                                   |            | NA         |                                                                                                                                                     |   |
|                                                           | 2.6 Was an appropriate analysis used to estimate the effect of assignment to intervention?                                                                                          |            | Y          |                                                                                                                                                     |   |
|                                                           | 2.7 If N/PN/NI to 2.6: Was there potential for a substantial impact (on the result) of the failure to analyse participants in the group to which they were randomized?              |            | NA         |                                                                                                                                                     |   |
| <b>Risk of bias judgement</b>                             |                                                                                                                                                                                     | <b>Low</b> |            |                                                                                                                                                     |   |
| <b>Bias due to missing outcome data</b>                   | 3.1 Were data for this outcome available for all, or nearly all, participants randomized?                                                                                           |            | Y          |                                                                                                                                                     |   |
|                                                           | 3.2 If N/PN/NI to 3.1: Is there evidence that result was not biased by missing outcome data?                                                                                        |            | NA         |                                                                                                                                                     |   |
|                                                           | 3.3 If N/PN to 3.2: Could missingness in the outcome depend on its true value?                                                                                                      |            | NA         |                                                                                                                                                     |   |
|                                                           | 3.4 If Y/PY/NI to 3.3: Is it likely that missingness in the outcome depended on its true value?                                                                                     |            | NA         |                                                                                                                                                     |   |
|                                                           | <b>Risk of bias judgement</b>                                                                                                                                                       |            | <b>Low</b> |                                                                                                                                                     |   |
| <b>Bias in measurement of the outcome</b>                 | 4.1 Was the method of measuring the outcome inappropriate?                                                                                                                          |            | N          |                                                                                                                                                     |   |
|                                                           | 4.2 Could measurement or ascertainment of the outcome have differed between intervention groups?                                                                                    |            | N          |                                                                                                                                                     |   |
|                                                           | 4.3 Were outcome assessors aware of the intervention received by study participants?                                                                                                |            | N          |                                                                                                                                                     |   |
|                                                           | 4.4 If Y/PY/NI to 4.3: Could assessment of the outcome have been influenced by knowledge of intervention received?                                                                  |            | NA         |                                                                                                                                                     |   |
|                                                           | 4.5 If Y/PY/NI to 4.4: Is it likely that assessment of the outcome was influenced by knowledge of intervention received?                                                            |            | NA         |                                                                                                                                                     |   |
|                                                           | <b>Risk of bias judgement</b>                                                                                                                                                       |            | <b>Low</b> |                                                                                                                                                     |   |
| <b>Bias in selection of the reported result</b>           | 5.1 Were the data that produced this result analysed in accordance with a pre-specified analysis plan that was finalized before unblinded outcome data were available for analysis? |            | Y          |                                                                                                                                                     |   |
|                                                           | 5.2 ... multiple eligible outcome measurements (e.g. scales, definitions, time points) within the outcome domain?                                                                   |            | N          |                                                                                                                                                     |   |
|                                                           | 5.3 ... multiple eligible analyses of the data?                                                                                                                                     |            | N          |                                                                                                                                                     |   |
|                                                           | <b>Risk of bias judgement</b>                                                                                                                                                       |            | <b>Low</b> |                                                                                                                                                     |   |
| <b>Overall bias</b>                                       | <b>Risk of bias judgement</b>                                                                                                                                                       |            | <b>Low</b> |                                                                                                                                                     |   |

| <b>Unique ID</b>    | 6                   | <b>Study ID</b>   | Bennardo, 2021                                              | <b>Assessor</b> | YM Zhang                                     |
|---------------------|---------------------|-------------------|-------------------------------------------------------------|-----------------|----------------------------------------------|
| <b>Ref or Label</b> | EMBASE 634074370    | <b>Aim</b>        | assignment to intervention (the 'intention-totreat' effect) |                 |                                              |
| <b>Experimental</b> | i-PRF               | <b>Comparator</b> | TA                                                          | <b>Source</b>   | Journal article(s) with results of the trial |
| <b>Outcome</b>      | VAS, lesion size    | <b>Results</b>    | 2023/1/10                                                   | <b>Weight</b>   | 1                                            |
| Domain              | Signalling question |                   | Response                                                    | Comments        |                                              |

|                                                           |                                                                                                                                                                                     |                   |                                                             |                                                                                                                                                                                                  |                                        |
|-----------------------------------------------------------|-------------------------------------------------------------------------------------------------------------------------------------------------------------------------------------|-------------------|-------------------------------------------------------------|--------------------------------------------------------------------------------------------------------------------------------------------------------------------------------------------------|----------------------------------------|
| <b>Bias arising from the randomization process</b>        | 1.1 Was the allocation sequence random?                                                                                                                                             |                   | Y                                                           | Each treatment (PRF and TA) was assigned to the specific site (right or left) by choosing between one of two identical, opaque envelopes containing both possible combinations. Each site always |                                        |
|                                                           | 1.2 Was the allocation sequence concealed until participants were enrolled and assigned to interventions?                                                                           |                   | Y                                                           |                                                                                                                                                                                                  |                                        |
|                                                           | 1.3 Did baseline differences between intervention groups suggest a problem with the randomization process?                                                                          |                   | N                                                           |                                                                                                                                                                                                  |                                        |
|                                                           | <b>Risk of bias judgement</b>                                                                                                                                                       |                   | <b>Low</b>                                                  |                                                                                                                                                                                                  |                                        |
| <b>Bias due to deviations from intended interventions</b> | 2.1. Were participants aware of their assigned intervention during the trial?                                                                                                       |                   | PY                                                          |                                                                                                                                                                                                  |                                        |
|                                                           | 2.2. Were carers and people delivering the interventions aware of participants' assigned intervention during the trial?                                                             |                   | Y                                                           |                                                                                                                                                                                                  |                                        |
|                                                           | 2.3. If Y/PY/NI to 2.1 or 2.2: Were there deviations from the intended intervention that arose because of the experimental context?                                                 |                   | N                                                           |                                                                                                                                                                                                  |                                        |
|                                                           | 2.4 If Y/PY to 2.3: Were these deviations likely to have affected the outcome?                                                                                                      |                   | NA                                                          |                                                                                                                                                                                                  |                                        |
|                                                           | 2.5. If Y/PY/NI to 2.4: Were these deviations from intended intervention balanced between groups?                                                                                   |                   | NA                                                          |                                                                                                                                                                                                  |                                        |
|                                                           | 2.6 Was an appropriate analysis used to estimate the effect of assignment to intervention?                                                                                          |                   | Y                                                           |                                                                                                                                                                                                  |                                        |
|                                                           | 2.7 If N/PN/NI to 2.6: Was there potential for a substantial impact (on the result) of the failure to analyse participants in the group to which they were randomized?              |                   | NA                                                          |                                                                                                                                                                                                  |                                        |
|                                                           | <b>Risk of bias judgement</b>                                                                                                                                                       |                   | <b>Low</b>                                                  |                                                                                                                                                                                                  |                                        |
| <b>Bias due to missing outcome data</b>                   | 3.1 Were data for this outcome available for all, or nearly all, participants randomized?                                                                                           |                   | Y                                                           |                                                                                                                                                                                                  |                                        |
|                                                           | 3.2 If N/PN/NI to 3.1: Is there evidence that result was not biased by missing outcome data?                                                                                        |                   | NA                                                          |                                                                                                                                                                                                  |                                        |
|                                                           | 3.3 If N/PN to 3.2: Could missingness in the outcome depend on its true value?                                                                                                      |                   | NA                                                          |                                                                                                                                                                                                  |                                        |
|                                                           | 3.4 If Y/PY/NI to 3.3: Is it likely that missingness in the outcome depended on its true value?                                                                                     |                   | NA                                                          |                                                                                                                                                                                                  |                                        |
|                                                           | <b>Risk of bias judgement</b>                                                                                                                                                       |                   | <b>Low</b>                                                  |                                                                                                                                                                                                  |                                        |
| <b>Bias in measurement of the outcome</b>                 | 4.1 Was the method of measuring the outcome inappropriate?                                                                                                                          |                   | N                                                           |                                                                                                                                                                                                  |                                        |
|                                                           | 4.2 Could measurement or ascertainment of the outcome have differed between intervention groups?                                                                                    |                   | N                                                           |                                                                                                                                                                                                  |                                        |
|                                                           | 4.3 Were outcome assessors aware of the intervention received by study participants?                                                                                                |                   | Y                                                           |                                                                                                                                                                                                  |                                        |
|                                                           | 4.4 If Y/PY/NI to 4.3: Could assessment of the outcome have been influenced by knowledge of intervention received?                                                                  |                   | N                                                           |                                                                                                                                                                                                  |                                        |
|                                                           | 4.5 If Y/PY/NI to 4.4: Is it likely that assessment of the outcome was influenced by knowledge of intervention received?                                                            |                   | NA                                                          |                                                                                                                                                                                                  |                                        |
|                                                           | <b>Risk of bias judgement</b>                                                                                                                                                       |                   | <b>Low</b>                                                  |                                                                                                                                                                                                  |                                        |
| <b>Bias in selection of the reported result</b>           | 5.1 Were the data that produced this result analysed in accordance with a pre-specified analysis plan that was finalized before unblinded outcome data were available for analysis? |                   | Y                                                           |                                                                                                                                                                                                  |                                        |
|                                                           | 5.2 ... multiple eligible outcome measurements (e.g. scales, definitions, time points) within the outcome domain?                                                                   |                   | N                                                           |                                                                                                                                                                                                  |                                        |
|                                                           | 5.3 ... multiple eligible analyses of the data?                                                                                                                                     |                   | N                                                           |                                                                                                                                                                                                  |                                        |
|                                                           | <b>Risk of bias judgement</b>                                                                                                                                                       |                   | <b>Low</b>                                                  |                                                                                                                                                                                                  |                                        |
| <b>Overall bias</b>                                       | <b>Risk of bias judgement</b>                                                                                                                                                       |                   | <b>Low</b>                                                  |                                                                                                                                                                                                  |                                        |
| <b>Unique ID</b>                                          | 7                                                                                                                                                                                   | <b>Study ID</b>   | M. Tunalı 2018                                              | <b>Assessor</b>                                                                                                                                                                                  | YM Zhang                               |
| <b>Ref or Label</b>                                       | 10.1111/jcpe.123_12914                                                                                                                                                              | <b>Aim</b>        | assignment to intervention (the 'intention-totreat' effect) |                                                                                                                                                                                                  |                                        |
| <b>Experimental</b>                                       | i-PRF                                                                                                                                                                               | <b>Comparator</b> | TA                                                          | <b>Source</b>                                                                                                                                                                                    | Conference abstract(s) about the trial |
| <b>Outcome</b>                                            | VASSign                                                                                                                                                                             | <b>Results</b>    | 2023/1/10                                                   | <b>Weight</b>                                                                                                                                                                                    | 1                                      |
| <b>Domain</b>                                             | <b>Signalling question</b>                                                                                                                                                          |                   | <b>Response</b>                                             | <b>Comments</b>                                                                                                                                                                                  |                                        |
| <b>Bias arising from the randomization process</b>        | 1.1 Was the allocation sequence random?                                                                                                                                             |                   | PY                                                          | 13 systemically healthy patients with bilateral EOLP were randomly treated with IPRF, and corticosteroids.                                                                                       |                                        |
|                                                           | 1.2 Was the allocation sequence concealed until participants were enrolled and assigned to interventions?                                                                           |                   | NI                                                          |                                                                                                                                                                                                  |                                        |

|  |                                                                                                            |                      |  |
|--|------------------------------------------------------------------------------------------------------------|----------------------|--|
|  | 1.3 Did baseline differences between intervention groups suggest a problem with the randomization process? | PN                   |  |
|  | <b>Risk of bias judgement</b>                                                                              | <b>Some concerns</b> |  |

|                                                           |                                                                                                                                                                        |            |  |
|-----------------------------------------------------------|------------------------------------------------------------------------------------------------------------------------------------------------------------------------|------------|--|
| <b>Bias due to deviations from intended interventions</b> | 2.1. Were participants aware of their assigned intervention during the trial?                                                                                          | NI         |  |
|                                                           | 2.2. Were carers and people delivering the interventions aware of participants' assigned intervention during the trial?                                                | PY         |  |
|                                                           | 2.3. If Y/PY/NI to 2.1 or 2.2: Were there deviations from the intended intervention that arose because of the experimental context?                                    | N          |  |
|                                                           | 2.4 If Y/PY to 2.3: Were these deviations likely to have affected the outcome?                                                                                         | NA         |  |
|                                                           | 2.5. If Y/PY/NI to 2.4: Were these deviations from intended intervention balanced between groups?                                                                      | NA         |  |
|                                                           | 2.6 Was an appropriate analysis used to estimate the effect of assignment to intervention?                                                                             | Y          |  |
|                                                           | 2.7 If N/PN/NI to 2.6: Was there potential for a substantial impact (on the result) of the failure to analyse participants in the group to which they were randomized? | NA         |  |
|                                                           | <b>Risk of bias judgement</b>                                                                                                                                          | <b>Low</b> |  |

|                                         |                                                                                                 |            |  |
|-----------------------------------------|-------------------------------------------------------------------------------------------------|------------|--|
| <b>Bias due to missing outcome data</b> | 3.1 Were data for this outcome available for all, or nearly all, participants randomized?       | Y          |  |
|                                         | 3.2 If N/PN/NI to 3.1: Is there evidence that result was not biased by missing outcome data?    | NA         |  |
|                                         | 3.3 If N/PN to 3.2: Could missingness in the outcome depend on its true value?                  | NA         |  |
|                                         | 3.4 If Y/PY/NI to 3.3: Is it likely that missingness in the outcome depended on its true value? | NA         |  |
|                                         | <b>Risk of bias judgement</b>                                                                   | <b>Low</b> |  |

|                                           |                                                                                                                          |            |  |
|-------------------------------------------|--------------------------------------------------------------------------------------------------------------------------|------------|--|
| <b>Bias in measurement of the outcome</b> | 4.1 Was the method of measuring the outcome inappropriate?                                                               | N          |  |
|                                           | 4.2 Could measurement or ascertainment of the outcome have differed between intervention groups?                         | N          |  |
|                                           | 4.3 Were outcome assessors aware of the intervention received by study participants?                                     | PY         |  |
|                                           | 4.4 If Y/PY/NI to 4.3: Could assessment of the outcome have been influenced by knowledge of intervention received?       | PN         |  |
|                                           | 4.5 If Y/PY/NI to 4.4: Is it likely that assessment of the outcome was influenced by knowledge of intervention received? | NA         |  |
|                                           | <b>Risk of bias judgement</b>                                                                                            | <b>Low</b> |  |

|                                                 |                                                                                                                                                                                     |            |  |
|-------------------------------------------------|-------------------------------------------------------------------------------------------------------------------------------------------------------------------------------------|------------|--|
| <b>Bias in selection of the reported result</b> | 5.1 Were the data that produced this result analysed in accordance with a pre-specified analysis plan that was finalized before unblinded outcome data were available for analysis? | Y          |  |
|                                                 | 5.2 ... multiple eligible outcome measurements (e.g. scales, definitions, time points) within the outcome domain?                                                                   | N          |  |
|                                                 | 5.3 ... multiple eligible analyses of the data?                                                                                                                                     | N          |  |
|                                                 | <b>Risk of bias judgement</b>                                                                                                                                                       | <b>Low</b> |  |

|                     |                               |                      |  |
|---------------------|-------------------------------|----------------------|--|
| <b>Overall bias</b> | <b>Risk of bias judgement</b> | <b>Some concerns</b> |  |
|---------------------|-------------------------------|----------------------|--|

|                     |                                                   |                   |                                                              |                 |         |
|---------------------|---------------------------------------------------|-------------------|--------------------------------------------------------------|-----------------|---------|
| <b>Unique ID</b>    | 8                                                 | <b>Study ID</b>   | Ahuja 2020                                                   | <b>Assessor</b> | Yuanmei |
| <b>Ref or Label</b> | Journal of Oral Biology and Craniofacial Research | <b>Aim</b>        | assignment to intervention (the 'intention-to-treat' effect) |                 |         |
| <b>Experimental</b> | PRP                                               | <b>Comparator</b> | TA                                                           | <b>Source</b>   |         |
| <b>Outcome</b>      | VASerythema scores                                | <b>Results</b>    | 2023/1/10                                                    | <b>Weight</b>   | 1       |

| <b>Domain</b>                                      | <b>Signalling question</b>                                                                                | <b>Response</b> | <b>Comments</b>                                                                                                                  |
|----------------------------------------------------|-----------------------------------------------------------------------------------------------------------|-----------------|----------------------------------------------------------------------------------------------------------------------------------|
| <b>Bias arising from the randomization process</b> | 1.1 Was the allocation sequence random?                                                                   | PY              | The study sample consisted of a total number of 20 patients of erosive OLP; randomly divided into twogroups of 10 patients each. |
|                                                    | 1.2 Was the allocation sequence concealed until participants were enrolled and assigned to interventions? | NI              |                                                                                                                                  |



|                                                           |                                                                                                                                                                        |                      |  |
|-----------------------------------------------------------|------------------------------------------------------------------------------------------------------------------------------------------------------------------------|----------------------|--|
|                                                           | 1.3 Did baseline differences between intervention groups suggest a problem with the randomization process?                                                             | N                    |  |
|                                                           | <b>Risk of bias judgement</b>                                                                                                                                          | <b>Some concerns</b> |  |
| <b>Bias due to deviations from intended interventions</b> | 2.1. Were participants aware of their assigned intervention during the trial?                                                                                          | Y                    |  |
|                                                           | 2.2. Were carers and people delivering the interventions aware of participants' assigned intervention during the trial?                                                | NI                   |  |
|                                                           | 2.3. If Y/PY/NI to 2.1 or 2.2: Were there deviations from the intended intervention that arose because of the experimental context?                                    | N                    |  |
|                                                           | 2.4 If Y/PY to 2.3: Were these deviations likely to have affected the outcome?                                                                                         | NA                   |  |
|                                                           | 2.5. If Y/PY/NI to 2.4: Were these deviations from intended intervention balanced between groups?                                                                      | NA                   |  |
|                                                           | 2.6 Was an appropriate analysis used to estimate the effect of assignment to intervention?                                                                             | Y                    |  |
|                                                           | 2.7 If N/PN/NI to 2.6: Was there potential for a substantial impact (on the result) of the failure to analyse participants in the group to which they were randomized? | NA                   |  |
|                                                           | <b>Risk of bias judgement</b>                                                                                                                                          | <b>Low</b>           |  |
|                                                           | 3.1 Were data for this outcome available for all, or nearly all, participants randomized?                                                                              | Y                    |  |

|                                         |                                                                                                 |            |  |
|-----------------------------------------|-------------------------------------------------------------------------------------------------|------------|--|
| <b>Bias due to missing outcome data</b> | 3.2 If N/PN/NI to 3.1: Is there evidence that result was not biased by missing outcome data?    | NA         |  |
|                                         | 3.3 If N/PN to 3.2: Could missingness in the outcome depend on its true value?                  | NA         |  |
|                                         | 3.4 If Y/PY/NI to 3.3: Is it likely that missingness in the outcome depended on its true value? | NA         |  |
|                                         | <b>Risk of bias judgement</b>                                                                   | <b>Low</b> |  |

|                                           |                                                                                                                          |            |  |
|-------------------------------------------|--------------------------------------------------------------------------------------------------------------------------|------------|--|
| <b>Bias in measurement of the outcome</b> | 4.1 Was the method of measuring the outcome inappropriate?                                                               | N          |  |
|                                           | 4.2 Could measurement or ascertainment of the outcome have differed between intervention groups?                         | N          |  |
|                                           | 4.3 Were outcome assessors aware of the intervention received by study participants?                                     | PN         |  |
|                                           | 4.4 If Y/PY/NI to 4.3: Could assessment of the outcome have been influenced by knowledge of intervention received?       | NA         |  |
|                                           | 4.5 If Y/PY/NI to 4.4: Is it likely that assessment of the outcome was influenced by knowledge of intervention received? | NA         |  |
|                                           | <b>Risk of bias judgement</b>                                                                                            | <b>Low</b> |  |

|                                                 |                                                                                                                                                                                     |            |  |
|-------------------------------------------------|-------------------------------------------------------------------------------------------------------------------------------------------------------------------------------------|------------|--|
| <b>Bias in selection of the reported result</b> | 5.1 Were the data that produced this result analysed in accordance with a pre-specified analysis plan that was finalized before unblinded outcome data were available for analysis? | Y          |  |
|                                                 | 5.2 ... multiple eligible outcome measurements (e.g. scales, definitions, time points) within the outcome domain?                                                                   | N          |  |
|                                                 | 5.3 ... multiple eligible analyses of the data?                                                                                                                                     | N          |  |
|                                                 | <b>Risk of bias judgement</b>                                                                                                                                                       | <b>Low</b> |  |

|                     |                               |                      |  |
|---------------------|-------------------------------|----------------------|--|
| <b>Overall bias</b> | <b>Risk of bias judgement</b> | <b>Some concerns</b> |  |
|---------------------|-------------------------------|----------------------|--|
